# Supplementary material for: Sarcopenic Obesity Accelerates the Progression of Cardiovascular-Kidney-Metabolic Syndrome: A Longitudinal Discovery and Cross-Sectional Validation Study
Source: Research Square preprint supplement (doi:10.21203/rs.3.rs-8814645/v1), 2026-02-16
Supplement: Supplementary file 1 [file 396cbfe844ef113dae1542df.docx]

Supplementary Figure S1. Internal Validation of the Anthropometric Prediction Equation against Dual-Energy X-ray Absorptiometry (DXA) Measurements in the NHANES Cohort


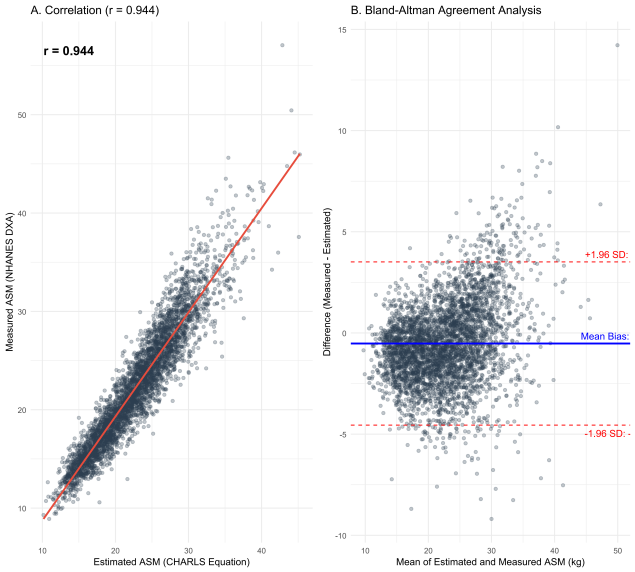


**(A)** Scatter plot illustrating the correlation between appendicular skeletal muscle mass (ASM) estimated using the anthropometric equation (Wen et al., 2011) and ASM measured by DXA. The Pearson correlation coefficient (**r = 0.944**) indicates a strong positive linear relationship. The red line represents the linear regression fit. **(B)** Bland-Altman plot assessing the agreement between the estimated and measured ASM. The blue solid line represents the mean bias (**-0.X kg**), and the red dashed lines indicate the 95% limits of agreement (±1.96 SD). **Abbreviation:** ASM, appendicular skeletal muscle mass; DXA, dual-energy X-ray absorptiometry; SD, standard deviation.

Supplementary Table 1. Fine-Gray Competing Risk Regression for Incident CVD Events.

| Phenotype | SHR (95% CI) | P Value |
| --- | --- | --- |
| Normal | 1.00 (Ref) | - |
| Obesity Only | 1.51 (1.31–1.74) | <0.001 |
| **Sarcopenia Only** | 1.23 (1.04–1.46) | 0.016 |
| **Sarcopenic Obesity** | **2.09 (1.77–2.46)** | **<0.001** |
